# Supplementary material for: Evaluation of the Extraction of Bioactive Compounds and the Saccharification of Cellulose as a Route for the Valorization of Spent Mushroom Substrate
Source: MDPI journal article supplement (doi:10.3390/molecules28135140), 2023-06-30
Supplement: s1 [file s1]

# Evaluation of the extraction of bioactive compounds and the saccharification of cellulose as a route for the valorization of spent mushroom substrate

Sarah J. Klausen <sup>1</sup>, Anne Bergljot Falck-Ytter <sup>1</sup>, Knut Olav Strætkvern <sup>1</sup> and Carlos Martin <sup>1,2,\*</sup>

<sup>1</sup> Inland Norway University of Applied Sciences, Department of Biotechnology, N-2317 Hamar, Norway; sa.schnell@gmail.com (S.J.K.); anne.falckytter@inn.no (A.B.F.-Y.); knut.stratkvern@inn.no (K.O.S.); carlos.medina@inn.no (C.M.)

<sup>2</sup> Umeå University, Department of Chemistry, SE-901 87 Umeå, Sweden

## Supplementary materials

**Table S1.** Chemical composition of the initial substrate used for the cultivation of the BPKO and NO strains. Mass fractions in % (dry weight). Mean values from triplicate analyses are presented for all the components, except extractives. Standard deviation is shown in parenthesis.

|                     | Initial substrate |
|---------------------|-------------------|
| Cellulose           | 36.1 (0.1)        |
| Hemicelluloses      | 27.5              |
| Klason lignin       | 18.8 (0.4)        |
| Water extractives   | 7.2               |
| Ethanol extractives | 2.0               |
| Total extractives   | 9.4               |
| Ash                 | 2.0 (<0.1)        |

**Table S2.** One-factor ANOVA analysis with replication of total phenolic content in Soxhlet extractions. Based on triplicate measurements from nine extractions (E0-E100).

| Source of Variation | Sum of Squares | Degree of freedom | Mean Square | Fishers-statistic | P-value  | F critical |
|---------------------|----------------|-------------------|-------------|-------------------|----------|------------|
| Between Groups      | 232349.3       | 8                 | 29043.66    | 420.5824          | 7.42E-19 | 2.510158   |
| Within Groups       | 1243.005       | 18                | 69.05583    |                   |          |            |
| Total               | 233592.3       | 26                |             |                   |          |            |

**Table S3.** Two-factor ANOVA analysis with replication of total carbohydrate content in ultrasound-assisted extractions. Based on triplicate measurements from nine extractions at three extraction times and three temperatures (30, 45 and 60 min) (35, 50 and 65 °C).

| <i>Source of Variation</i> | <i>Sum of Squares</i> | <i>Degree of freedom</i> | <i>Mean Square</i> | <i>Fishers-statistic</i> | <i>P-value</i> | <i>F critical</i> |
|----------------------------|-----------------------|--------------------------|--------------------|--------------------------|----------------|-------------------|
| Sample                     |                       |                          |                    |                          |                |                   |
| (Temperature)              | 20.91902              | 2                        | 10.45951           | 56.08168                 | 1.849E-08      | 3.554557          |
| Columns (Time)             | 0.295382              | 2                        | 0.147691           | 0.791889                 | 0.4681492      | 3.554557          |
| Interaction                | 2.19708               | 4                        | 0.54927            | 2.945069                 | 0.0490992      | 2.927744          |
| Within                     | 3.357089              | 18                       | 0.186505           |                          |                |                   |
| Total                      | 26.76857              | 26                       |                    |                          |                |                   |

**Table S4.** One-factor ANOVA analysis with replication, of antioxidant activity (measured by FRAP) in reflux extractions. Based on triplicate measurements from seven extractions at different extraction times (60-240 min).

| <i>Source of Variation</i> | <i>Sum of Squares</i> | <i>Degree of freedom</i> | <i>Mean Square</i> | <i>Fishers-statistic</i> | <i>P-value</i> | <i>F critical</i> |
|----------------------------|-----------------------|--------------------------|--------------------|--------------------------|----------------|-------------------|
| Between Groups             | 0.03082               | 6                        | 0.005137           | 2.59E+30                 | 1.7E-209       | 2.847726          |
| Within Groups              | 2.77E-32              | 14                       | 1.98E-33           |                          |                |                   |
| Total                      | 0.03082               | 20                       |                    |                          |                |                   |

**Table S5.** Correlation between caffeic acid concentration and antioxidant activity (FRAP).

|                               |             |
|-------------------------------|-------------|
| <b>Coefficient (r ):</b>      | 0.90037366  |
| <b>Number of data points:</b> | 10          |
| <b>T statistics:</b>          | 5.85276631  |
| <b>Degree of Freedom:</b>     | 8           |
| <b>p-value:</b>               | 3.81580E-04 |

**Table S6.** Correlation between total phenolic content and antioxidant activity (FRAP). Data points from all extractions were included.

|                               |             |
|-------------------------------|-------------|
| <b>Coefficient (r ):</b>      | 0.89512921  |
| <b>Number of data points:</b> | 23          |
| <b>T statistics:</b>          | 9.20128968  |
| <b>Degree of Freedom:</b>     | 21          |
| <b>p-value:</b>               | 8.15234E-09 |

**Table S7.** Correlation of ferulic acid concentration with antioxidant activity (FRAP).

|                               |             |
|-------------------------------|-------------|
| <b>Coefficient (r ):</b>      | 0.3946195   |
| <b>Number of data points:</b> | 10          |
| <b>T statistics:</b>          | 1.21473476  |
| <b>Degree of Freedom:</b>     | 8           |
| <b>p-value:</b>               | 2.59102E-01 |

**Table S8.** Correlation of chlorogenic acid concentration with antioxidant activity (FRAP). Data points from all extractions were included.

|                               |             |
|-------------------------------|-------------|
| <b>Coefficient (r ):</b>      | 0.59772873  |
| <b>Number of data points:</b> | 10          |
| <b>T statistics:</b>          | 2.10881309  |
| <b>Degree of Freedom:</b>     | 8           |
| <b>p-value:</b>               | 6.79988E-02 |

**Table S9.** Correlation between total carbohydrate content and antioxidant activity (FRAP). Data points from all extractions were included.

|                               |             |
|-------------------------------|-------------|
| <b>Coefficient (r ):</b>      | 0.82717863  |
| <b>Number of data points:</b> | 23          |
| <b>T statistics:</b>          | 6.74558663  |
| <b>Degree of Freedom:</b>     | 21          |
| <b>p-value:</b>               | 1.13029E-06 |
